# Supplementary material for: CRISPR/Cas9 for Cancer Therapy: Hopes and Challenges
Source: Biomedicines. 2018 Nov 12;6(4):105. doi: 10.3390/biomedicines6040105 (PMC6315587; doi:10.3390/biomedicines6040105)
Supplement: Supplementary file 1 [file biomedicines-06-00105-s001.xlsx]

## Sheet: SearchResults
Rank,"Title","Status","Study Results","Conditions","Interventions","Phases","Other IDs","Locations","URL"
1,"A Safety and Efficacy Study of TALEN and CRISPR/Cas9 in the Treatment of HPV-related Cervical Intraepithelial Neoplasia‚Ö†","Not yet recruiting","No Results Available","Human Papillomavirus-Related Malignant Neoplasm","Biological: TALEN|Biological: CRISPR/Cas9","Phase 1","2017CRISPR/Cas9&TALEN","The First Affiliated Hospital of Sun Yat-sen University, Guangzhou, Guangdong, China","https://Clin…
2,"Safety of Transplantation of CRISPR CCR5 Modified CD34+ Cells in HIV-infected Subjects With Hematological Malignances","Recruiting","No Results Available","HIV-1-infection","Genetic: CCR5 gene modification","Not Applicable","307-HSPC-R5","307 Hospital of PLA (Affiliated Hospital of Academy to Military Medical Sciences), Beijing, Beijing, China","https://ClinicalTrials.gov/show/NCT03164135"
3,"Examining the Knowledge, Attitudes, and Beliefs of Sickle Cell Disease Patients, Parents of Patients With Sickle Cell Disease, and Providers Towards the Integration of CRISPR in Clinical Care","Recruiting","No Results Available","Sickle Cell Disease","","","999917081|17-HG-N081","National Human Genome Research Institute (NHGRI), Bethesda, Maryland, United States","https://ClinicalTrials.gov/sh…
4,"A Safety and Efficacy Study Evaluating CTX001 in Subjects With Transfusion-Dependent Œ≤-Thalassemia","Recruiting","No Results Available","Beta-Thalassemia|Thalassemia|Genetic Diseases, Inborn|Hematologic Diseases|Hemoglobinopathies","Biological: CTX001","Phase 1|Phase 2","CTX001-111","Research site, Regensburg, Germany|Research Site, Tuebingen, Germany|Research Site, London, United Kingdom","h…
5,"NY-ESO-1-redirected CRISPR (TCRendo and PD1) Edited T Cells (NYCE T Cells)","Recruiting","No Results Available","Multiple Myeloma|Melanoma|Synovial Sarcoma|Myxoid/Round Cell Liposarcoma","Biological: NY-ESO-1 redirected autologous T cells with CRISPR edited endogenous TCR and PD-1|Drug: Cyclophosphamide|Drug: Fludarabine|Device: NY-ESO-1 expression testing","Phase 1","UPCC# 25416	IRB #826672","University of Pennsylvania, Philadelphia, Pennsylvania, United States","https://ClinicalTrials.gov/show/NCT03399448"
6,"Study of CRISPR-Cas9 Mediated PD-1 and TCR Gene-knocked Out Mesothelin-directed CAR-T Cells in Patients With Mesothelin Positive Multiple Solid Tumors.","Recruiting","No Results Available","Solid Tumor, Adult","Biological: anti-mesothelin CAR-T cells","Phase 1","CHN-PLAGH-BT-028","Biotherapeutic Department and Hematology Department of Chinese PLA General Hospital, Beijing, China","https://Clin…
7,"Study of People With Metastatic Gastrointestinal Epithelial Cancer Administering Tumor-Infiltrating Lymphocytes in Which the Gene Encoding CISH Was Inactivated Using the CRISPR/Cas9 System","Withdrawn","No Results Available","Gastrointestinal Epithelial Cancer|Gastrointestinal Neoplasm|Cancer of Gastrointestinal Tract|Cancer, Gastrointestinal","Drug: Cyclophosphamide|Drug: Fludarabine|Drug: Al…
8,"Identification of Host Factors of Norovirus Infections in Mini-Gut Model","Recruiting","No Results Available","Gastrointestinal Infection","Procedure: Duodenal biopsy|Procedure: Saliva","Not Applicable","MIC_CHAN_GRF_17_18_v1_20160930","Endoscopy Centre, Prince of Wales Hospital, Hong Kong, China","https://ClinicalTrials.gov/show/NCT03342547"
9,"A Study Evaluating UCART019 in Patients With Relapsed or Refractory CD19+ Leukemia and Lymphoma","Recruiting","No Results Available","B Cell Leukemia|B Cell Lymphoma","Biological: UCART019","Phase 1|Phase 2","CHN-PLAGH-BT-021","Biotherapeutic Department and Hematology Department of Chinese PLA General Hospital, Beijing, Beijing, China","https://ClinicalTrials.gov/show/NCT03166878"
10,"Lavage of the Uterine Cavity for Diagnosis of Ovarian Cancer","Not yet recruiting","No Results Available","High Grade Ovarian Serous Adenocarcinoma|Stage III Ovarian Cancer AJCC v8|Stage IIIA Ovarian Cancer AJCC v8|Stage IIIA1 Ovarian Cancer AJCC v8|Stage IIIA2 Ovarian Cancer AJCC v8|Stage IIIB Ovarian Cancer AJCC v8|Stage IIIC Ovarian Cancer AJCC v8|Stage IV Ovarian Cancer AJCC v8|Stage IVA …
11,"PD-1 Knockout Engineered T Cells for Advanced Esophageal Cancer","Recruiting","No Results Available","Esophageal Cancer","Other: PD-1 Knockout T Cells","Phase 2","HangzhouCH07","Hangzhou Cancer Hospital, Hangzhou, Zhejiang, China","https://ClinicalTrials.gov/show/NCT03081715"
12,"Stem Cells in NF1 Patients With Tumors of the Central Nervous System","Recruiting","No Results Available","Neurofibromatosis Type 1|Tumors of the Central Nervous System","Diagnostic Test: Collection of Stem Cells","","Pro00006360","Children's National Medical Center, Washington, District of Columbia, United States","https://ClinicalTrials.gov/show/NCT03332030"
13,"A Feasibility and Safety Study of Universal Dual Specificity CD19 and CD20 or CD22 CAR-T Cell Immunotherapy for Relapsed or Refractory Leukemia and Lymphoma","Recruiting","No Results Available","B Cell Leukemia|B Cell Lymphoma","Biological: Universal Dual Specificity CD19 and CD20 or CD22 CAR-T Cells","Phase 1|Phase 2","CHN-PLAGH-BT-026","Biotherapeutic Department and Hematology Department of…
14,"First-time-in-human (FTIH) Study of GSK3145095 Alone and in Combination With Other Anticancer Agents in Adults With Advanced Solid Tumors","Not yet recruiting","No Results Available","Neoplasms, Pancreatic","Drug: GSK3145095|Drug: Pembrolizumab","Phase 2","205013","","https://ClinicalTrials.gov/show/NCT03681951"
15,"Cell Therapy for High Risk T-Cell Malignancies Using CD7-Specific CAR Expressed On Autologous T Cells","Not yet recruiting","No Results Available","T-cell Acute Lymphoblastic Leukemia|T-cell Acute Lymphoblastic Lymphoma|T-non-Hodgkin Lymphoma","Genetic: CD7.CAR/28zeta CAR T cells|Drug: Fludarabine|Drug: Cytoxan","Phase 1","H-43761 - CRIMSON","Houston Methodist Hospital, Houston, Texas, United…
16,"PD-1 Knockout Engineered T Cells for Muscle-invasive Bladder Cancer","Not yet recruiting","No Results Available","Invasive Bladder Cancer Stage IV","Biological: PD-1 Knockout T Cells|Drug: Cyclophosphamide|Drug: IL-2","Phase 1","11007965938","Department of Urology Peking University First Hospital, Beijing, Beijing, China","https://ClinicalTrials.gov/show/NCT02863913"
17,"PD-1 Knockout Engineered T Cells for Castration Resistant Prostate Cancer","Not yet recruiting","No Results Available","Hormone Refractory Prostate Cancer","Biological: PD-1 Knockout T Cells|Drug: Cyclophosphamide|Drug: IL-2","Phase 1","11007965939","Department of Urology Peking University First Hospital, Beijing, Beijing, China","https://ClinicalTrials.gov/show/NCT02867345"
18,"PD-1 Knockout Engineered T Cells for Metastatic Renal Cell Carcinoma.","Not yet recruiting","No Results Available","Metastatic Renal Cell Carcinoma","Biological: PD-1 Knockout T Cells|Drug: Cyclophosphamide|Drug: IL-2","Phase 1","11007965940","","https://ClinicalTrials.gov/show/NCT02867332"
19,"PD-1 Knockout Engineered T Cells for Metastatic Non-small Cell Lung Cancer","Active, not recruiting","No Results Available","Metastatic Non-small Cell Lung Cancer","Drug: Cyclophosphamide|Other: PD-1 Knockout T Cells","Phase 1","MHC001","West China Hospital, Sichuan University, Chengdu, Sichuan, China","https://ClinicalTrials.gov/show/NCT02793856"
20,"PD-1 Knockout EBV-CTLs for Advanced Stage Epstein-Barr Virus (EBV) Associated Malignancies","Recruiting","No Results Available","Stage IV Gastric Carcinoma|Stage IV Nasopharyngeal Carcinoma|T-Cell Lymphoma Stage IV|Stage IV Adult Hodgkin Lymphoma|Stage IV Diffuse Large B-Cell Lymphoma","Drug: Fludarabine|Drug: Cyclophosphamide|Drug: Interleukin-2","Phase 1|Phase 2","PD-1-KO-EBV-CTL","The Comp…
21,"Malignant Hyperthermia Registry and Genetic Testing","Recruiting","No Results Available","Malignant Hyperthermia","","","2015-1749","Cincinnati Children's Hospital Medical Center, Cincinnati, Ohio, United States","https://ClinicalTrials.gov/show/NCT02964481"

## Sheet: Hoja1
Study start	ID	Title			Condition	Phase	Status	Intervention	Purpouse	Location
January 15, 2018	2017CRISPR/Cas9&TALEN	A Safety and Efficacy Study of Transcription Activator-like Effector Nucleases and Clustered Regularly Interspaced Short Palindromic Repeat/Cas9 in the Treatment of HPV-related Cervical Intraepithelial NeoplasiaⅠ			Human Papillomavirus-Related Malignant Neoplasm	Phase I	Not yet recruiting	Biological	Treatment	Guangzhou, Guangdong, China
May 30, 2017	307-HSPC-R5	Safety and Feasibility Study of Allotransplantation of CRISPR/Cas9 CCR5 Gene Modified CD34+ Hematopoietic Stem/Progenitor Cells in HIV-infected Subjects With Hematological Malignances			HIV-1-infection	NA	Recruiting	Genetic	Treatment	Beijing, China
October 17, 2018	17-HG-N081	Examining the Knowledge, Attitudes, and Beliefs of Sickle Cell Disease Patients, Parents of Patients With Sickle Cell Disease, and Providers Towards the Integration of CRISPR in Clinical Care			Sickle cell disease	ND	Recruiting	ND	Observational	Bethesda, Maryland, United States
September 14, 2018	CTX001-111	A Phase 1/2 Study of the Safety and Efficacy of a Single Dose of Autologous CRISPR-Cas9 Modified CD34+ Human Hematopoietic Stem and Progenitor Cells (hHSPCs) in Subjects With Transfusion-Dependent β-Thalassemia			Beta-Thalassemia	Phase I/II	Recruiting	Biological	Treatment	London, United Kingdom; Tuebingen, Germany; Regensburg, Germany
September 5, 2018	UPCC# 25416	Phase 1 Trial of Autologous T Cells Engineered to Express NY-ESO-1 TCR and CRISPR Gene Edited to Eliminate Endogenous TCR and PD-1 (NYCE T Cells)			Multiple Myeloma (MM), Synovial Sarcoma (SS), Melanoma and Myxoid/Round Cell Liposarcoma (MRCL)	Phase I	Recruiting	Biological	Other	Philadelphia, Pennsylvania, United States
March 1, 2018	CHN-PLAGH-BT-028	Phase I Study to Evaluate Treatment of CRISPR-Cas9 Mediated PD-1 and TCR Gene-knocked Out Chimeric Antigen Receptor (CAR) T Cells in Patients With Mesothelin Positive Multiple Solid Tumors			Solid Tumour, adult	Phase I	Recruiting	Biological	Treatment	Beijing, China
May 17,2018	18-C-0103	A Phase I/II Trial in Patients With Metastatic Gastrointestinal Epithelial Cancer Administering Tumor-Infiltrating Lymphocytes in Which the Gene Encoding CISH Was Inactivated Using the CRISPR/Cas9 System			Gastrointestinal cancer	Phase I/II	withdrawn	Biological	Treatment
April 18, 2018	MIC_CHAN_GRF_17_18_v1_20160930	Genome-wide CRISPR Screen for Host Factors Associated With Norovirus Infections in Stem Cell-derived Human Intestinal Enteroid Model			Gastrointestinal infection	NA	Recruiting	Procedure	Basic Science	Hong Kong, China
June 2017	CHN-PLAGH-BT-021	Phase I/II Study to Determine the Safety, Tolerability, Biological Activity and Efficacy of Universal CRISPR-Cas9 Gene-Editing CAR-T Cells Targeting CD19(UCART019) in Patients With Relapsed or Refractory CD19+ Leukemia and Lymphoma			B-cell Leukemia and B-cell Lymphoma	Phase I/II	Recruiting	Biological	Treatment	Beijing, China
March 20, 2017	HangzhouCH07	A Phase II Trial of PD-1 Knockout Engineered T Cells for the Treatment of Advanced Esophageal Cancer			Esophageal cancer	Phase II	Recruiting	Other	Treatment	Hangzhou, Zhejiang, China
November 27, 2015	Pro00006360	Development of Stem Cell Lines in Children With Neurofibromatosis Type 1 and Tumors of the Central Nervous System			Neurofibromatosis	ND	Recruiting	Diagnostic Test	Observational	Washington, Columbia, United States
January 2, 2018	CHN-PLAGH-BT-026	Phase I/II Study to Evaluate Treatment of Relapsed or Refractory Leukemia and Lymphoma With Universal CRISPR-Cas9 Gene-Editing CAR-T Cells Targeting CD19 and CD20 or CD22			B-cell Leukemia and B-cell Lymphoma	Phase I	Recruiting	Biological	Treatment	Beijing, China
March 1, 2019	H-43761 - CRIMSON	Cell Therapy for High Risk T-Cell Malignancies Using CD7-specific CAR Expressed On Autologous T Cells (CRIMSON)			T-cell Acute Lymphoblastic Leukemia, T-cell Acute Lymphoblastic Lymphoma, T-non-Hodgkin Lymphoma	Phase I	Not yet recruiting	Genetic	Treatment	Houston, Texas, United States
September 2016	11007965938	A Dose-escalation Phase I Trial of PD-1 Knockout Engineered T Cells for the Treatment of Muscle-invasive Bladder Cancer			Invasive Bladder Cancer type IV	Phase I	Not yet recruiting	Biological	Treatment	Beijing, China
November 2016	11007965939	A Dose-escalation Phase I Trial of PD-1 Knockout Engineered T Cells for the Treatment of Castration Resistant Prostate Cancer			Hormone Refractory Prostate Cancer	Phase I	Not yet recruiting	Biological	Treatment	Beijing, China
November 2016	11007965940	A Dose-escalation Phase I Trial of PD-1 Knockout Engineered T Cells for the Treatment of Metastatic Renal Cell Carcinoma			Metastatic Renal Cell Carcinoma	Phase I	Not yet recruiting	Biological	Treatment	Beijing, China
August 2016	MHC001	A Dose-escalation Phase I Trial of PD-1 Knockout Engineered T Cells for the Treatment of Metastatic Non-small Cell Lung Cancer			Metastatic Non-small Cell Lung Cancer	Phase I	Active, not recruiting	Other	Treatment	Chengdu, Sichuan, China
April 7, 2017	PD-1-KO-EBV-CTL	A Phase I/II Trial of PD-1 Knockout EBV-CTLs for Advanced Stage EBV Associated Malignancies			Nasopharyngeal Carcinoma, Gastric Carcinoma and Lymphoma	Phase I/II	Recruiting	Drug	Treatment	Nanjing, Jiangsu, China
Table 1. Current undergoing clinical trials that implies the use of the CRISPR/Cas9 system for its treatment.
